1 **Bystander CD4<sup>+</sup> T cells infiltrate human tumors and are phenotypically distinct**

2

3 Yannick SIMONI<sup>1,2,3\*</sup>, Shamin LI<sup>1,2\*</sup>, Summer ZHUANG<sup>1</sup>, Antja HEIT<sup>1</sup>, Si-Lin  
4 KOO<sup>4,6</sup>, I-Ting CHOW<sup>4</sup>, William W. KWOK<sup>4</sup>, Iain Beehuat TAN<sup>4,6</sup>, Daniel S.W.  
5 TAN<sup>5,6</sup>, Evan W. NEWELL<sup>1,2,7</sup>

6

7 <sup>1</sup> Fred Hutch Cancer Research Center, Vaccine and Infectious Disease Division.  
8 Seattle, U.S.A.

9 <sup>2</sup> Agency for Science, Technology and Research Singapore (A\*STAR), Singapore  
10 Immunology Network (SigN), Singapore

11 <sup>3</sup> ImmunoSCAPE Pte Ltd, Singapore

12 <sup>4</sup> Benaroya Research Institute, Seattle

13 <sup>4</sup> Department of Anatomical Pathology, Singapore General Hospital, Singapore  
14 General Hospital, Singapore

15 <sup>5</sup> Division of Medical Oncology, National Cancer Centre Singapore (NCCS),  
16 Singapore

17 <sup>6</sup> Agency for Science, Technology and Research (A\*STAR), Genome Institute of  
18 Singapore (GIS), Singapore

19 <sup>7</sup> Lead contact

20 \* These authors contribute equally to this work

21

22 Corresponding author: Yannick Simoni ([yannick.simoni@immunoscape.com](mailto:yannick.simoni@immunoscape.com)) or  
23 Evan W. Newell ([enewell@fredhutch.org](mailto:enewell@fredhutch.org))

24

25 Keywords: CD4, CD8, CD39, TIL, HCMV, Cancer, Tumor, Infiltrating, Bystander

26 **Abstract**

27 Tumor-specific T cells likely underpin effective immune checkpoint-blockade  
28 therapies. Yet, most studies focus on Treg cells and CD8<sup>+</sup> tumor-infiltrating  
29 lymphocytes (TILs). Here we study CD4<sup>+</sup> TILs in human lung and colorectal cancers  
30 and observe that non-Treg CD4<sup>+</sup> TILs average more than 70% of total CD4<sup>+</sup> TILs in  
31 both cancer types. Leveraging high dimensional analyses including mass cytometry  
32 and single-cell sequencing, we reveal that CD4<sup>+</sup> TILs are heterogeneous at both gene  
33 and protein levels, within each tumor and across patients. Consistently, we find  
34 different subsets of CD4<sup>+</sup> TILs showing characteristics of effectors, tissue resident  
35 memory (Trm) or exhausted cells (expressing PD-1, CTLA-4 and CD39). In both  
36 cancer types, the frequencies of CD39<sup>-</sup> non-Treg CD4<sup>+</sup> TILs strongly correlate with  
37 frequencies of CD39<sup>-</sup> CD8<sup>+</sup> TILs, which we and others have previously shown to be  
38 enriched for cells specific for cancer-unrelated antigens (bystanders). *Ex-vivo*, we  
39 demonstrate that CD39<sup>-</sup> CD4<sup>+</sup> TILs can be specific for cancer unrelated antigens,  
40 such as HCMV epitopes. Overall, our findings highlight that CD4<sup>+</sup> TILs cells are not  
41 necessarily tumor-specific and suggest measuring CD39 expression as a  
42 straightforward way to quantify or isolate bystander CD4<sup>+</sup> T cells.

### 43 Graphical abstract

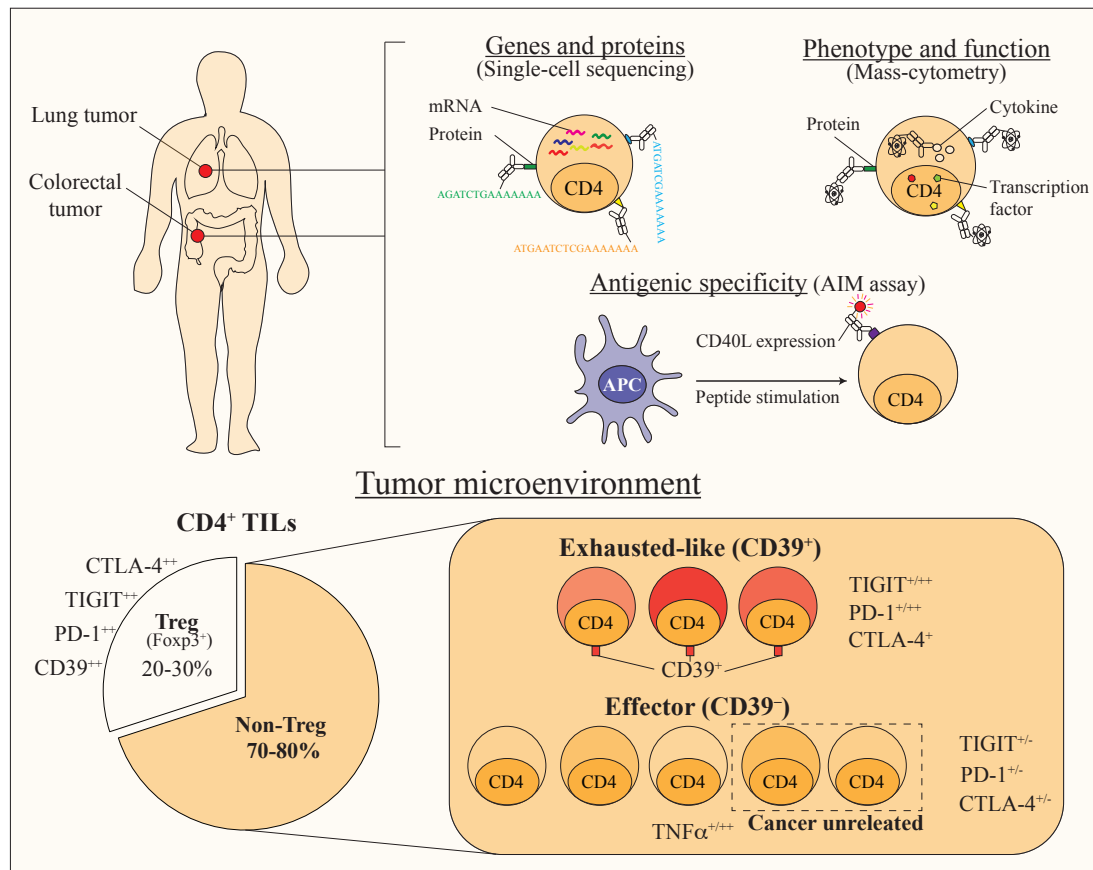

44  
45

## 46 **Introduction**

47 Numerous studies have established the importance of T cells in controlling  
48 cancer (1). Nonetheless, tumors can escape this immune surveillance by diverse  
49 mechanisms (2). As various forms of cancer therapy exist, immunotherapy is rapidly  
50 evolving and is proved to be remarkably effective at restoring T cell mediated  
51 immune responses. Strategies include immune checkpoint blocking receptors (i.e anti-  
52 CTLA4 or anti-PD1 (3), autologous T cell transfer (4), as well as therapeutic cancer  
53 vaccines (5). However, the efficacy of these therapies is unpredictable and only some  
54 patients respond well to the treatments (6). Therefore, a better understanding of T cell  
55 biology – CD8 and CD4 – in the tumor microenvironment is urged to improve cancer  
56 therapies. Recently, we showed in the context of human colorectal and lung cancers  
57 that CD8<sup>+</sup> tumor-infiltrating lymphocytes (TILs) are not only specific for tumor  
58 antigens but can also recognize a wide range of cancer-unrelated epitopes (called  
59 bystander CD8<sup>+</sup> TILs) (7). We suggested that measuring CD39 expression could be a  
60 straightforward way to quantify or isolate bystander CD8<sup>+</sup> T cells and could be a  
61 potential biomarker for immunotherapy (7). These observations have been confirmed  
62 in different cancer types (8-11).

63 Although CD4<sup>+</sup> TILs are also involved in tumor responses, most studies have  
64 focused on the role of FoxP3-expressing regulatory T cells (Treg) in cancer (12-14).  
65 Treg cells suppress tumor immunity by various mechanisms including: 1) Disruption  
66 of the metabolic pathway (i.e. CD39 expression), 2) Modulation of dendritic cells  
67 function (i.e. CTLA-4 expression), 3) Production of anti-inflammatory molecules (i.e.  
68 IL-10, TGFβ), 4) Induction of apoptosis (15). Abundant Treg infiltration into tumors  
69 is strongly associated with poor prognosis in multiple cancer types (13, 16). Because  
70 of their deleterious role, several molecules have been developed to target specifically  
71 these cells in human cancer (e.g. anti-CTLA-4, anti-CD25) (17-21).

72 Importantly, a large proportion of CD4<sup>+</sup> TILs are made up of non-Treg cells.  
73 Studies in mice have shown that these cells play a key role in anti-tumor responses  
74 (22). By producing IFNγ, they induce an up-regulation of MHC class I and II  
75 expression by tumor cells and dendritic cells (DC) (23). Production of IFNγ by CD4<sup>+</sup>  
76 TILs also induce expression of chemokines supporting homing of CD8<sup>+</sup> T cells to the  
77 tumor site (e.g. CXCL10) (23). Activated CD4<sup>+</sup> T cells express CD40L by which they  
78 can activate DC, and support CD8<sup>+</sup> T cells priming and memory formation (23). They

79 can have a cytotoxic function and directly kill tumor cells as well (24). Based on these  
80 observations, developing CD4-based therapeutic vaccination and/or adoptive cell  
81 therapies by targeting tumor-specific CD4<sup>+</sup> T cells would be essential (22, 25-28).  
82 The limited number of tools that allow studying non-Treg CD4<sup>+</sup> TILs (i.e. MHC class  
83 II tetramers, *in-vitro* assays) had so far made this population poorly characterized,  
84 compared to CD8<sup>+</sup> TILs and Treg cells. Uncovering the role of these cells in the  
85 tumor microenvironment would thus help design new strategies to manipulate them  
86 and improve immunotherapy efficiency. Here we study CD4<sup>+</sup> TILs in human  
87 colorectal cancer (CRC) and non-small cell lung cancer (NSCLC) using  
88 complementary high-dimensional single-cell analysis (single-cell sequencing, mass-  
89 cytometry) and *in-vitro* stimulation assay. Our findings highlight that non-Treg CD4<sup>+</sup>  
90 TILs are heterogeneous and can be specific for cancer unrelated antigens, just as  
91 observed for CD8<sup>+</sup> TILs, and these cells lack expression of CD39. Taken together, we  
92 hypothesize that CD39 expression is a straightforward way to quantify or isolate  
93 bystander CD4<sup>+</sup> TILs, thus opening new diagnostic and therapeutic avenues.

## 94 **Results**

### 95 **Single-cell Protein/mRNA sequencing reveals the heterogeneity of CD4<sup>+</sup> TILs.**

96 In order to comprehensively examine CD4<sup>+</sup> tumor infiltrating T cells (TILs), we  
97 leveraged the use of a recent single-cell sequencing technology that allows  
98 simultaneous analysis of surface protein and mRNA expression at the single-cell level  
99 (29, 30) (Figure 1A). The surface protein antibodies panel for instance included a  
100 broad range of markers associated with T cell differentiation, activation, tissue  
101 residency, and dysfunction/exhaustion status (co-stimulatory and co-inhibitory  
102 receptors). Prior to the single-cell experiment, tumor cells (Epcam<sup>+</sup>), myeloid cells  
103 (CD14<sup>+</sup>) and B cells (CD19<sup>+</sup>) were depleted (See Methods). To assess the  
104 composition of the total sequenced cells, we performed a Uniform Manifold  
105 Approximation and Projection (UMAP) based on surface protein expressions (31).  
106 UMAP is a dimension reduction algorithm that performs a pair-wise comparison of  
107 the cellular phenotypes to optimally plot similar cells close to each other (31). For our  
108 analysis, 48 surface parameters, or dimensions, were reduced into two dimensions  
109 (UMAP1 and UMAP2). This visualization allowed us to easily identify a population  
110 of contaminating tumor cells (CD45<sup>-</sup>), NK cells (CD3<sup>-</sup>), CD8<sup>+</sup> TILs (CD3<sup>+</sup> CD8<sup>+</sup>)  
111 and our cells of interest: CD4<sup>+</sup> TILs (CD3<sup>+</sup> CD4<sup>+</sup>) (Figure 1B, 1C and S1A). The  
112 phenotypic profile that we observed for these cells was depicted in a heatmap  
113 showing expression intensities of surface markers (Figure 1D). As for the CD4<sup>+</sup> TILs,  
114 we observed a first subset characterized by markers associated with Treg cells  
115 (CD25<sup>+</sup> CD39<sup>+</sup> ICOS<sup>+</sup> GITR<sup>+</sup>). Interestingly, the remaining CD4<sup>+</sup> TILs could be  
116 divided based on their expression of CD39, a marker associated with chronic TCR  
117 stimulation (32)(Figure 1D and S1B). Based on their phenotypic difference, we  
118 studied each population at the transcriptomic level. As expected, the CD4<sup>+</sup> subset  
119 defined phenotypically as Treg cells expressed their signature genes (i.e. *FOXP3*,  
120 *CTLA4*, *DUSP4*) (33). Interestingly, both Treg and CD39<sup>+</sup> CD4<sup>+</sup> TILs expressed  
121 *IL32*, a cytokine which enhances NK cell sensitivity and cytotoxicity against tumor  
122 cells (34). Furthermore, compared to CD39<sup>+</sup>, CD39<sup>-</sup> CD4<sup>+</sup> TILs expressed more of  
123 *TNF* transcript, suggesting a non-exhausted profile. Our results did not show  
124 significant differences in *IFNG*, cytotoxicity or chemokine expression between the  
125 different subsets of CD4<sup>+</sup> TILs (Figure 1E).

126 Taken together, our results indicated that CD4<sup>+</sup> TILs were composed of  
127 heterogeneous populations that could be divided into Treg, CD39<sup>+</sup> and CD39<sup>-</sup> non-  
128 Treg CD4<sup>+</sup> T cells. Additional samples will be needed to validate these observations  
129 in other patients.

130

131 **CD4<sup>+</sup> TILs are composed of a majority of non-Treg cells with a contrasted**  
132 **phenotypic profile.**

133 We next investigated whether the heterogeneity we observed were consistent across  
134 patients and different tumor types. For that purpose, we profiled a cohort of patients  
135 with Non-small cell lung cancer (NSCLC, n=28) and colorectal cancer (CRC, n=51).  
136 We developed a mass cytometry panel consisting of 38 heavy metal-labelled  
137 antibodies to identify and characterize CD4<sup>+</sup> TILs with markers of tissue residency,  
138 activation and inhibitory receptors (Table S1). We distinguished Treg and non-Treg  
139 cells based on the expression of FoxP3 (Figure 2A). With only 35% and 24% of CD8<sup>+</sup>  
140 TILs in NSCLC and CRC respectively, the majority of CD3<sup>+</sup> TILs were composed of  
141 CD4<sup>+</sup> TILs (Figure 2B and 2C). Non-Treg CD4<sup>+</sup> TILs accounted for a higher  
142 proportion of the CD4<sup>+</sup> TILs as compared to Treg CD4<sup>+</sup> TILs, with a mean frequency  
143 of 78.8% vs. 19% in NSCLC and 66% vs. 35% in CRC, supporting the importance of  
144 studying this population in tumor immune response (Figure 2B and C). All non-Treg  
145 CD4<sup>+</sup> TILs displayed a memory or effector phenotype (CD45RO<sup>+</sup> – 95.7%) and many  
146 expressed the activation/tissue residency marker CD69 (CD69<sup>+</sup> – 77%), excluding a  
147 blood contamination for most of these cells (Figure 2D and S2A). Expression of  
148 activation markers and inhibitory receptors varied greatly in these cohorts, indicating  
149 an important phenotypic diversity of CD4<sup>+</sup> TILs between patients (Figure 2D and  
150 S2A). Non-Treg CD4<sup>+</sup> TILs expressed co-stimulatory receptors, such as CD28,  
151 CD38, ICOS but only a small fraction expressed CD127 (17.1%). Interestingly, some  
152 non-Treg CD4<sup>+</sup> TILs expressed CD25 (26.7%), suggesting that the use of CD25 and  
153 CD127 alone to identify Treg cells in the context of tumor infiltrates could lead to a  
154 contamination by non-Treg CD4<sup>+</sup> TILs (i.e. Foxp3<sup>-</sup>) (Figure 2D, S2A and 2E). More  
155 interestingly, non-Treg CD4<sup>+</sup> TIL cells also expressed hallmarks of “exhausted” cells  
156 at different levels between patients. Expression of inhibitory receptors associated with  
157 chronic antigen stimulation such as TIGIT (56.9%), PD-1 (71.6%), CTLA-4 (29.6%)  
158 suggested a role for these cells in tumor immunity (Figure 2D and S2A). Of note,

159 frequency of CD39<sup>+</sup> non-Treg CD4<sup>+</sup> TILs (38.2%) was very heterogeneous, ranging  
160 from 4.6% to 70%.

161 After exploring the diversity of non-Treg CD4<sup>+</sup> TILs across patients, we performed  
162 UMAP analysis to explore the heterogeneity of CD4<sup>+</sup> TILs within individuals. In one  
163 example, we distinguished several cell clusters, illustrating a broad phenotypic  
164 heterogeneity (Figure 2E and S2B). We first identified a cell population with Treg  
165 cells features (FoxP3<sup>+</sup>, CD25<sup>+</sup>, CD127<sup>-</sup>, CTLA-4<sup>+</sup>). Among the non-Treg CD4<sup>+</sup> TILs,  
166 we observed presence of multiple cell clusters expressing stimulatory and inhibitory  
167 markers at variable intensities. For instance, CD127 (a.k.a IL-7R) that promotes  
168 survival of effector cells, could only be found in some of the clusters. Within the cell  
169 clusters expressing CD39, we detected differential expression levels of inhibitory  
170 receptors such as PD-1, CTLA-4 and Ki-67 suggesting an ongoing antigen exposure  
171 and cell expansion (Figure 2E and S3).

172 Overall, these data showed a high degree of phenotypic diversity among non-Treg  
173 CD4<sup>+</sup> TILs within individual tumors and across patients. Phenotypic analysis showed  
174 that both effectors and exhausted cells were found at the same time in the same tumor.  
175

### 176 **Cancer-unrelated non-Treg CD4<sup>+</sup> TILs infiltrate tumor and lack CD39** 177 **expression.**

178 As we and others have shown that cancer-unrelated bystander CD8<sup>+</sup> TILs are  
179 abundant in cancer and phenotypically distinct (i.e. lack of CD39 expression) (7-9),  
180 we explored whether CD39<sup>-</sup> non-Treg CD4<sup>+</sup> TILs could be also enriched for cancer  
181 unrelated antigen-specific cells. Strikingly, we observed an important heterogeneity  
182 for CD39 expression across both cohorts, with patients showing up to 95% of CD39<sup>-</sup>  
183 non-Treg CD4<sup>+</sup> TILs and others showing less than 20% (Figure 3A, 3B and 3C). We  
184 performed a correlation analysis comparing frequencies of CD39<sup>-</sup> non-Treg CD4<sup>+</sup>  
185 TILs with CD39<sup>-</sup> CD8<sup>+</sup> TILs of the same patient (Figure 3B and 3C). In both tumor  
186 types, we observed that frequencies of bystander CD8<sup>+</sup> TILs strongly correlate with  
187 the frequency of CD39<sup>-</sup> non-Treg CD4<sup>+</sup> TILs. We hypothesized that if CD39<sup>-</sup> non-  
188 Treg CD4<sup>+</sup> TILs were bystander, they should express a different phenotypic profile.  
189 By looking at inhibitory receptors associated with chronic antigen stimulation, we  
190 observed a significantly lower expression of TIGIT, CTLA-4 and PD-1 on CD39<sup>-</sup>  
191 non-Treg CD4<sup>+</sup> TILs as compared to their CD39<sup>+</sup> counterparts (Figure 3D, 3E and  
192 S3). Functionally, CD39<sup>-</sup> non-Treg CD4<sup>+</sup> TILs produced more of TNF $\alpha$  and IL-2,



193 suggesting that these cells are more functionally capable and less exhausted (Figure  
194 3F, 3G and S3).

195 To confirm our hypothesis of bystander CD4<sup>+</sup> TILs, we first screened tumor tissues  
196 with MHC class II tetramers specific for allergen, tumor antigens, EBV or Flu  
197 epitopes. Even though we detected these cells in blood after tetramer enrichment  
198 (Figure S4), we failed to detect them in tumor tissues (see Discussion). In order to  
199 bypass the use of tetramers to assess presence of CD4<sup>+</sup> T cells specific for cancer  
200 unrelated antigens in the tumors, we optimized an activation-induced marker (AIM)  
201 assay to assess activation of CD4<sup>+</sup> TILs stimulated with cancer-unrelated epitopes  
202 (here HCMV peptide pool, see methods)(35)(Figure 4A). By measuring the up-  
203 regulation of both CD40L and CD69, we observed the presence of HCMV-specific  
204 CD4<sup>+</sup> TILs from the tumors (Figure 4B). When compared with the paired CD4<sup>+</sup> T  
205 cells from PBMC, we observed a higher frequency and fold change of HCMV-  
206 specific cells in CD4<sup>+</sup> TILs, showing that similarly to CD8<sup>+</sup> TILs, cancer-unrelated  
207 CD4<sup>+</sup> T cells infiltrate tumor tissues (Figure 4C and D). These cells also lacked CD39  
208 expression when analyzed together with total CD4<sup>+</sup> TILs (Figure 4E), suggesting that  
209 the lack of CD39 could also be a straightforward marker to identify non-Treg cancer-  
210 unrelated CD4<sup>+</sup>TILs.

## 211 **Discussion**

212 Since the late 1990s, research has highlighted the central role of T cells in antitumor  
213 immunity (36). Notably, because of their ability to directly kill tumor cells and a  
214 better knowledge of MHC class I tumor antigens, much more attention has been  
215 dedicated to the role of CD8<sup>+</sup> T cells (37-39). In the meantime, many studies have  
216 also elucidated the detrimental role of CD4<sup>+</sup> Treg cells in antitumor immunity and put  
217 these cells at the center stage as immunotherapy targets (40). Our work brings to light  
218 that consistently large fractions of total T cells infiltrating the tumor are made up of  
219 non-Treg CD4<sup>+</sup> T cells in both colorectal and lung cancer. Similar observation has  
220 been previously made in breast cancer (14). In lymph nodes, non-Treg CD4<sup>+</sup> T cells  
221 support the priming of tumor-specific CD8<sup>+</sup> T cells (41). In tumor microenvironment,  
222 these cells enhance the activity of CD8<sup>+</sup> TILs by producing cytokines (i.e. TNF $\alpha$ ,  
223 IFN $\gamma$ ) but can also act as effectors by eliminating tumor cells in a direct or indirect  
224 way (42, 43). Contrary to MHC class I which is expressed by tumor cells and presents  
225 tumor antigens to CD8<sup>+</sup> TILs, MHC class II is usually not expressed (or expressed at  
226 low levels) by human tumor cells (44). However, we clearly observe an up-regulation  
227 of markers associated with chronic antigen exposure in non-Treg CD4<sup>+</sup> TILs, such as  
228 Ki-67, PD-1, CTLA-4 indicating that these cells can be activated at the tumor site as  
229 well (3). We hypothesize that this activation might be mediated by antigen presenting  
230 cells, such as macrophages and dendritic cells. The distinct phenotype of non-Treg  
231 CD4<sup>+</sup> TILs observed across patients, especially regarding expression of inhibitory  
232 receptors, could be explained by tumor-intrinsic factors shaping the individual tumor  
233 immune microenvironment (45). Furthermore, we also observe heterogeneity of non-  
234 Treg CD4<sup>+</sup> TILs within the same tumor, with cells showing an effector phenotype and  
235 others expressing hallmarks of chronic antigen stimulation, notably CD39.

236 CD39 is an enzyme that converts extracellular ATP to AMP. In turn, CD73 converts  
237 AMP into adenosine, shown to possess immunosuppressive activity (46). Conversion  
238 of extracellular ATP in adenosine by CD39 thus leads to inhibition of CD4, CD8, NK  
239 cell function, decreased phagocytosis and antigens presentation activities by  
240 macrophages and dendritic cells (47, 48). Widely reported in Treg-related literature,  
241 CD39 has also been described on HIV- , HBV- and tumor-specific CD8<sup>+</sup> T cells as a  
242 marker expressed during chronic antigen stimulation (7, 49-51). Yet, only few groups  
243 have characterized this marker on non-Treg CD4<sup>+</sup> TILs. *In-vitro*, CD39 is expressed

244 on Non-Treg CD4<sup>+</sup> TILs after activation and on Listeria-specific CD4<sup>+</sup> T cells after  
245 infection (32). Interestingly, a pioneer study reported an increased frequency of  
246 pathogenic CD39<sup>+</sup> non-Treg CD4<sup>+</sup> T cells in the peripheral blood of patients with  
247 renal allograft rejection (52). As previously observed for CD8<sup>+</sup> TILs, CD39 could be  
248 a useful marker to identify tumor-specific CD4<sup>+</sup> T cells as well within the tumor  
249 micro-environment. Additional studies will be needed to confirm this hypothesis and  
250 to better understand the regulation of CD39 in non-Treg CD4<sup>+</sup> TILs.

251 By investigating the antigen specificity of CD4<sup>+</sup> TILs, we failed to detect MHC class  
252 II tetramer positive cells in the tumors. This negative result could be attributed to the  
253 limited number of tetramers tested, the low frequency of specific T cells for any given  
254 epitope combined with the low number of cells obtained from tumor dissociation(53).  
255 Using the AIM assay, we detected cancer unrelated CD4<sup>+</sup> TILs. These HCMV-  
256 specific cells lack CD39 expression, which mirrors our previous observations with  
257 CD39<sup>-</sup> CD8<sup>+</sup> TILs specific for cancer unrelated antigens (HCMV, EBV, Flu) (7). Of  
258 note, the observation that tumor-specific CD4 and CD8 responses are coordinated is  
259 consistent with the notion that tumor-specific CD4 responses are also required for the  
260 induction of tumor-specific CD8 response as recently illustrated in mice (22).  
261 Besides, up to 95% of non-Treg CD4<sup>+</sup> TILs lack CD39 expression in some patients.  
262 Taken together, these two observations could suggest that the majority of effectors  
263 TILs are not tumor-specific. This hypothesis could explain, along with other factors,  
264 the absence of response in most patients treated with anti-PD-1 (54). Bystander CD4<sup>+</sup>  
265 (and CD8<sup>+</sup>) TILs are in fact not passive in the tumor microenvironment, and several  
266 reports have highlighted their role in modulating disease severity upon TCR-  
267 independent activation (55, 56). Because of their TCR specificity for known viral  
268 epitopes, virus-specific bystander TILs could also be specifically targeted by  
269 therapeutic approaches to produce cytokines and enhance anti-tumor response (11).  
270 Overall, our findings highlight that non-Treg CD4<sup>+</sup> TILs cells represent one of the  
271 main lymphocytes recruited at the tumor site and as well a potential target of interest  
272 for immunotherapy.

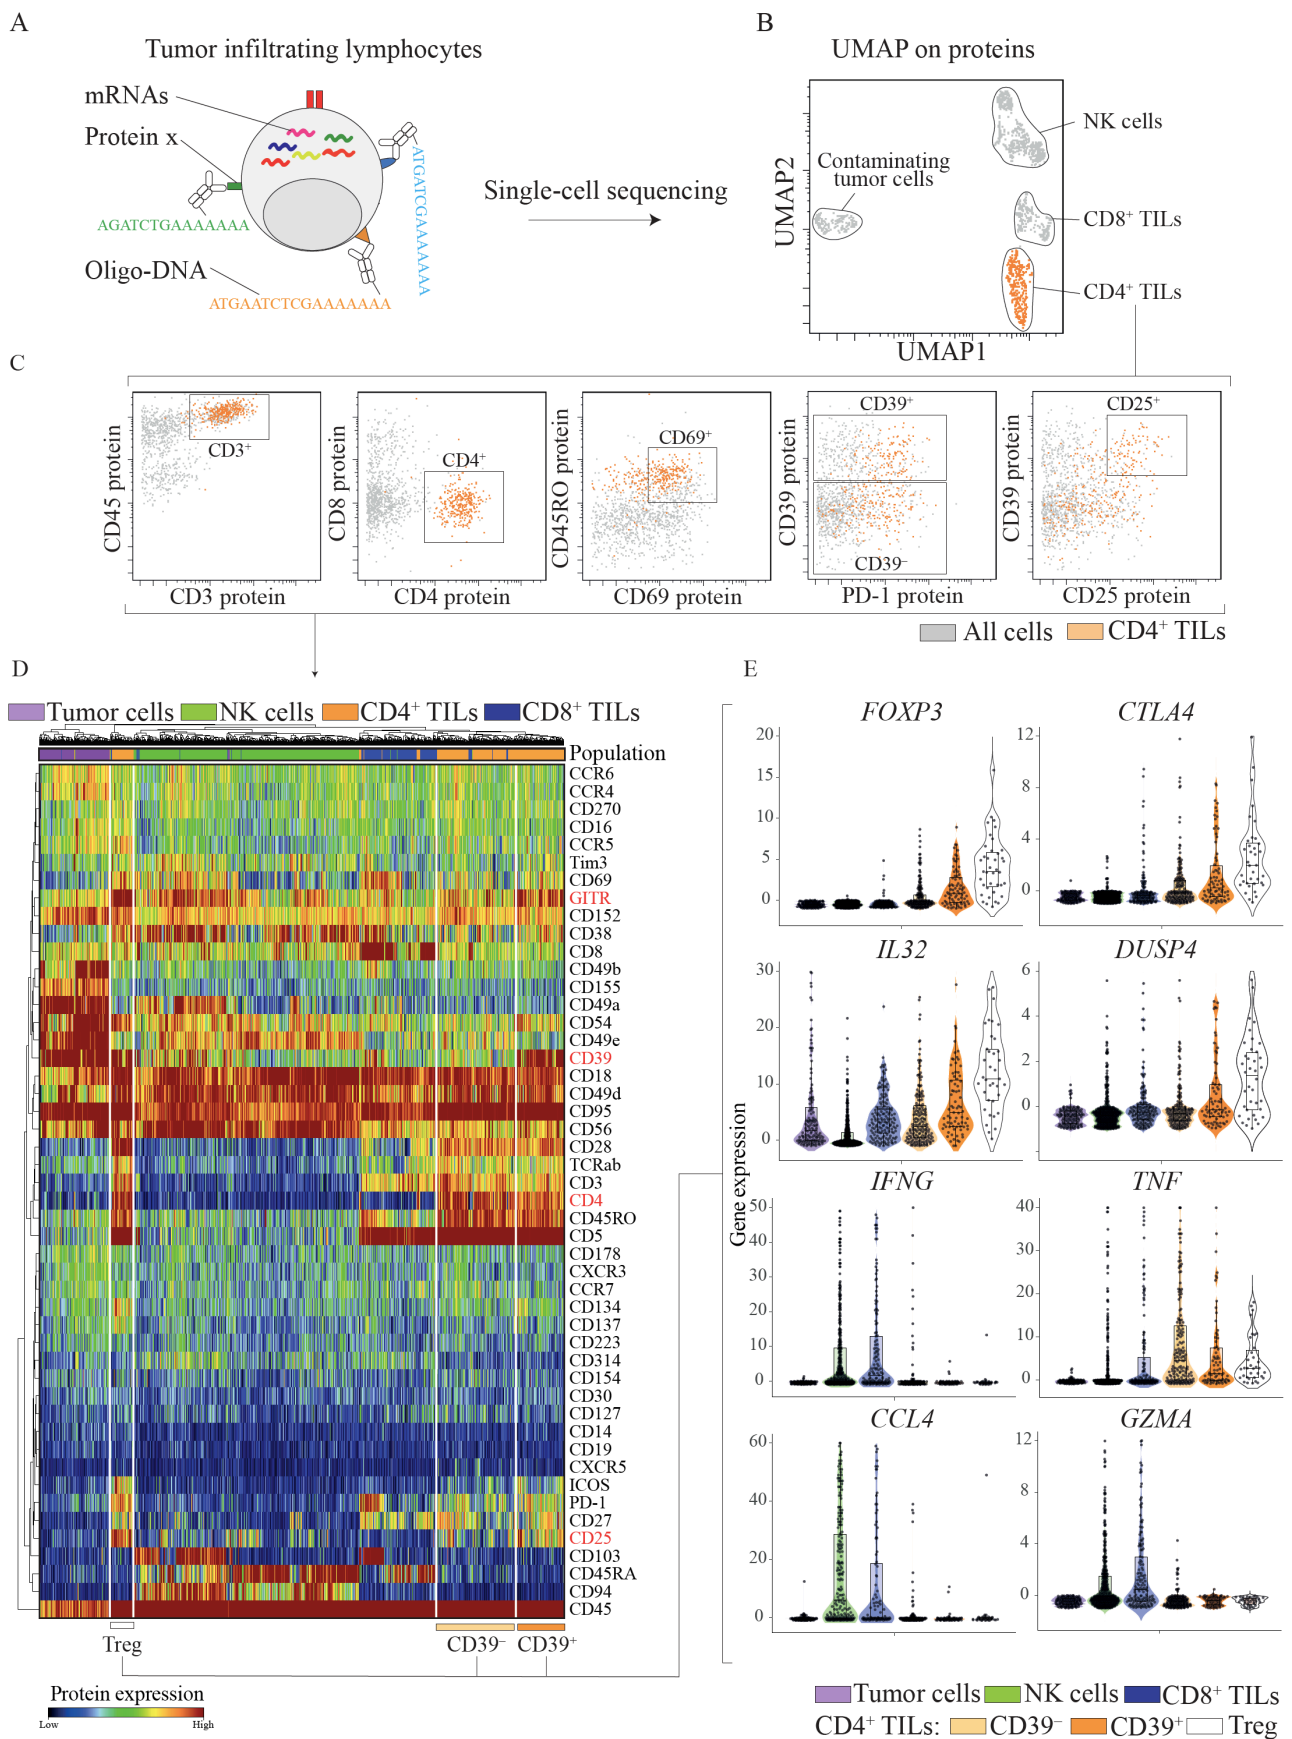

**Figure 1. Phenotypic and transcriptomic heterogeneity of CD4<sup>+</sup> TILs.**

**A.** Schematic for targeted mRNA sequencing combined with BD AbSeq Rhapsody system that allows analysis of both genes and surface proteins at the single cell level. **B.** UMAP plot on total cells sequenced from a colorectal tumor sample (patient 1211), after depletion for tumor cells (EpCAM<sup>+</sup>), B cells (CD19<sup>+</sup>) and myeloid cells (CD33<sup>+</sup>) before the experiment. **C.** Single-cell sequencing data showing expression of selected oligo-tagged surface protein markers for CD4<sup>+</sup> TILs (orange) and total cells (grey). **D.** Heatmap from scRNAseq data depicting protein expression of all sequenced cells from this tumor at the single-cell level. Each cell population is identified by a different color code as indicated. **E.** Violin plots comparing expression of selected genes in different cell subsets of interests.

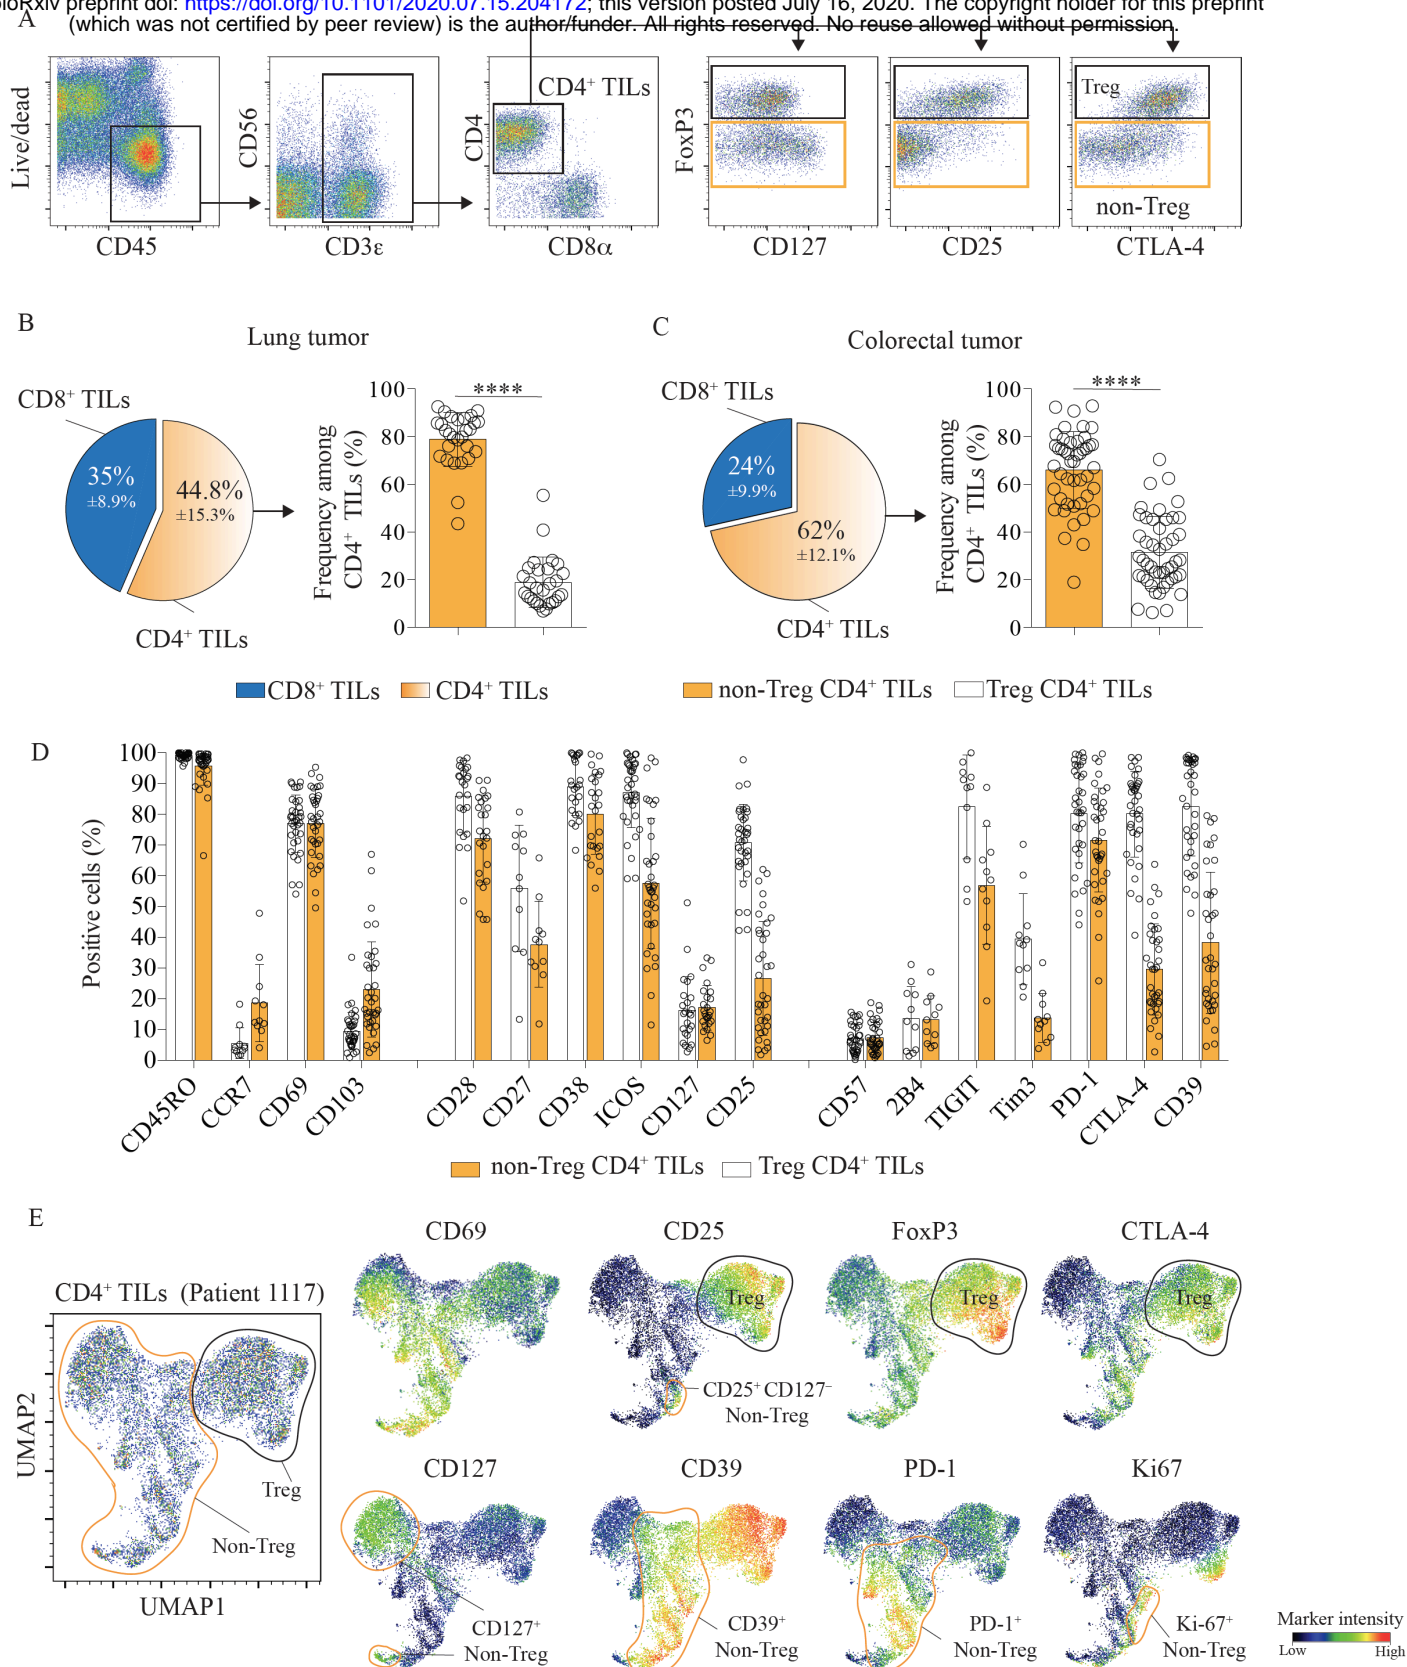

**Figure 2. CD4+ TILs are composed of a majority of non-Treg cells with a heterogeneous phenotypic profile.**

**A.** Gating strategy to distinguish between Treg (Live CD45<sup>+</sup> CD3ε<sup>+</sup> CD4<sup>+</sup> Foxp3<sup>+</sup>) and Non-Treg CD4<sup>+</sup> TILs (FoxP3<sup>-</sup>). Representative mass-cytometry data from one colorectal cancer patient. **B.** Frequency of CD4<sup>+</sup> and CD8<sup>+</sup> TILs among total CD3<sup>+</sup> TILs (left panel) and frequency of Non-Treg CD4<sup>+</sup> TILs vs. Treg cells in lung cancer (right panel), n=28 patients. Data from at least 10 independent experiments using mass cytometry. Means ± SD. **C.** Frequency of CD4<sup>+</sup> and CD8<sup>+</sup> TILs among total CD3<sup>+</sup> TILs (left panel) and frequency of Non-Treg CD4<sup>+</sup> TILs and Treg cells in colorectal cancer (right panel), n=51 patients. Data from at least 10 independent experiments using mass cytometry. Means ± SD. **D.** Expression of selected markers by Non-Treg CD4<sup>+</sup> (orange) and Treg (white) TILs in colorectal tumors (n=25-36 biologically independent individuals). Data from at least 10 independent mass cytometry experiments. Means ± SD, Paired t test - two-tailed. **E.** UMAP plot on total CD4<sup>+</sup> TILs exported from a representative colorectal tumor sample. UMAP analysis was performed to explore the heterogeneity of non-Treg CD4<sup>+</sup> TILs at the individual level (see also Figure S2B).

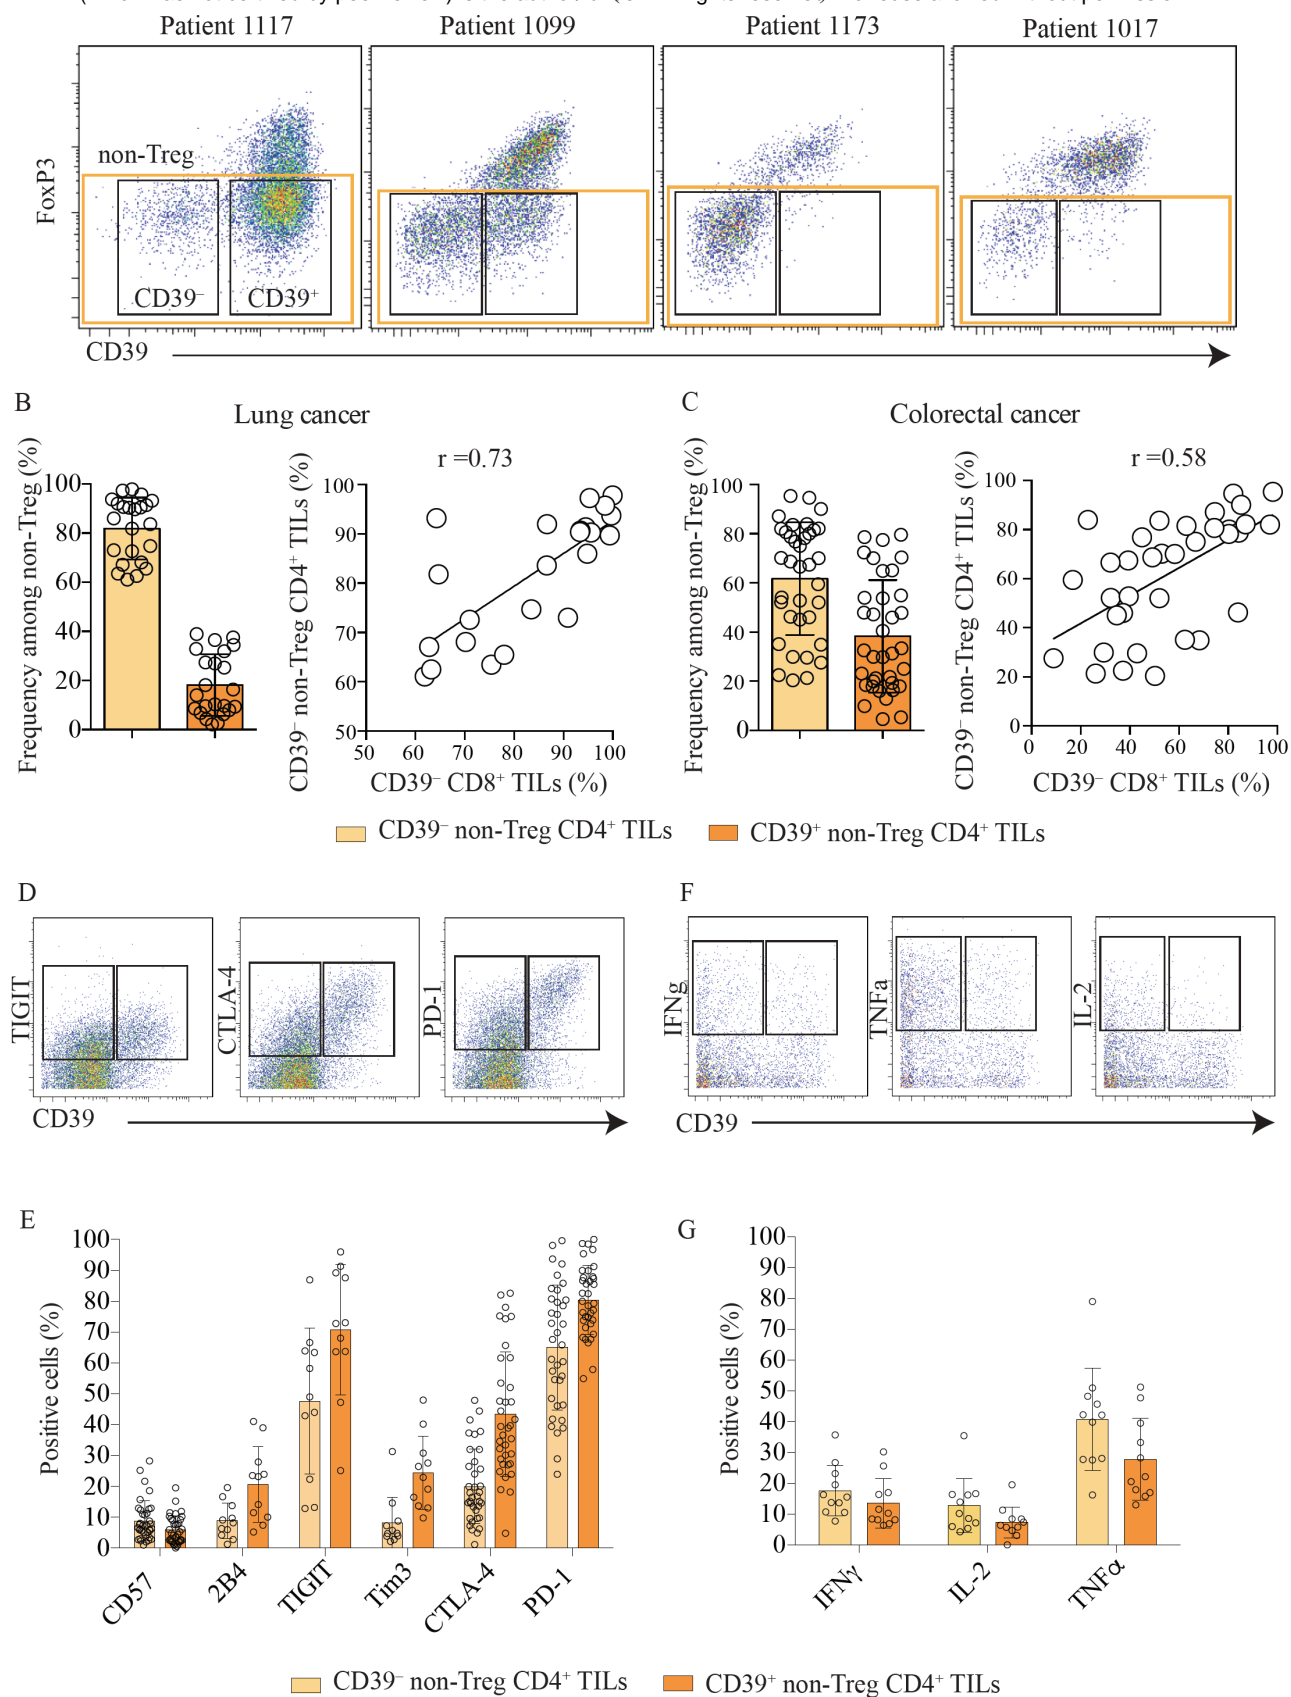

**Figure 3. CD39<sup>-</sup> non-Treg CD4<sup>+</sup> TILs are phenotypically and functionally not exhausted.**

**A.** Dot plots showing differential expression of CD39 vs. Foxp3 in CD4<sup>+</sup> TILs of 4 colorectal cancer patients. **B.** CD39 expression on Non-Treg CD4<sup>+</sup> vs. Treg TILs (left panel) and correlation between CD39<sup>-</sup> Non-Treg CD4<sup>+</sup> TILs and CD39<sup>-</sup> CD8<sup>+</sup> TILs in lung cancer (right panel), n=21. **C.** CD39 expression on Non-Treg CD4<sup>+</sup> vs. Treg TILs (left panel) and correlation between CD39<sup>-</sup> Non-Treg CD4<sup>+</sup> TILs and CD39<sup>+</sup> CD8<sup>+</sup> TILs in lung cancer (right panel). **D.** Representative staining showing expression of CD39 vs. inhibitory receptors (TIGIT, CTLA-4 and PD-1) on Non-Treg CD4<sup>+</sup>TILs in colorectal cancer. **E.** Comparison of inhibitory receptors expression between CD39<sup>-</sup> and CD39<sup>+</sup> Non-Treg CD4<sup>+</sup> TILs in colorectal cancer (See Figure S3 for lung cancer). **F.** Representative staining comparing expression of CD39 vs. cytokine production (IFN $\gamma$ , TNF $\alpha$  and IL-2) on Non-Treg CD4<sup>+</sup>TILs in colorectal cancer. **G.** Comparison of cytokine production between CD39<sup>-</sup> and CD39<sup>+</sup> Non-Treg CD4<sup>+</sup> TILs in colorectal cancer (See Figure S3 for lung cancer).

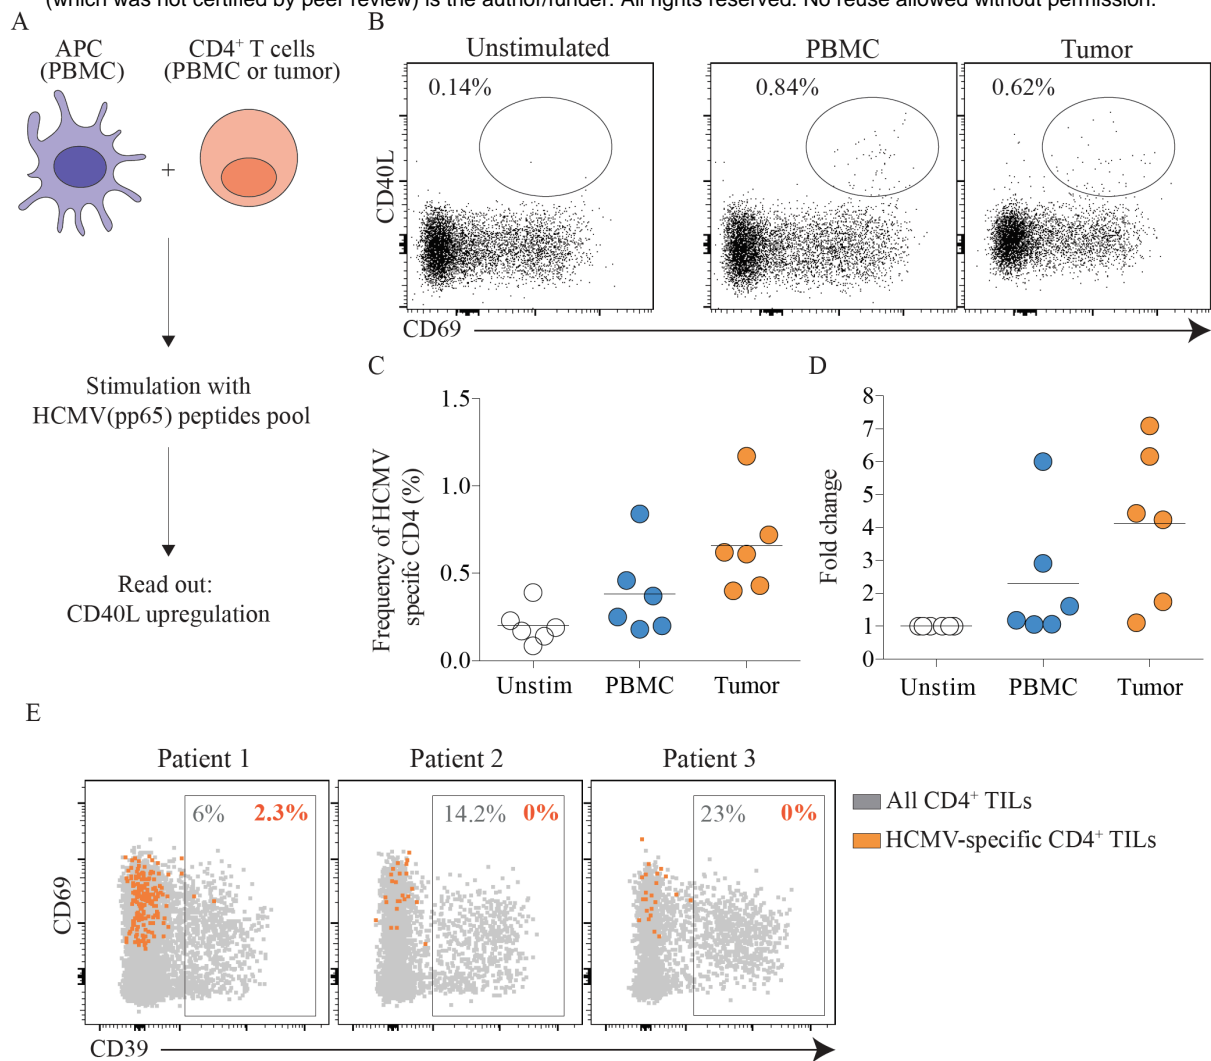

#### Figure 4. Bystander CD4<sup>+</sup> TILs infiltrate tumor and lack expression of CD39

**A.** Schematic for in-vitro activation induced marker (AIM) assay to assess the reactivity of CD4<sup>+</sup> TILs to HCMV pp65 epitopes as previously described (see methods, (35)). APC and CD4<sup>+</sup> T cells were isolated from the same donor. **B.** Representative staining showing expression of CD40L and CD69 by CD4<sup>+</sup> T cells from PBMC or tumor sample after overnight stimulation with HCMV pp65 peptides pool (see methods). **C.** Frequency of HCMV (pp65)-specific CD4<sup>+</sup> T cells in PBMC and tumor. n=6 patients, **D.** Fold change of HCMV (pp65)-specific CD4<sup>+</sup> T cells in PBMC and tumor compared to unstimulated. n=6 patients. **E.** Representative dot plots showing expression of CD39 by HCMV-specific CD4<sup>+</sup> TILs (orange) vs. total CD4<sup>+</sup> TILs (grey) from three lung cancer patients.

## 273 **Methods**

### 274 **Human samples.**

275 PBMC and tumor samples were obtained from patients with colorectal cancer or lung  
276 cancer. The use of human tissues was approved by the appropriate institutional  
277 research boards, A\*STAR and the Singapore Immunology Network, Singapore.

278

### 279 **Cell isolation.**

280 Samples were prepared as previously described (57). In brief, tissues were  
281 mechanically dissociated into small pieces and incubated at 37 °C for 15 to 40 min in  
282 DMEM + collagenase IV (1 mg/ml) + DNase (15 µg/ml). Digestion was stopped by  
283 addition of RPMI containing 5% FBS. Dissociated tissues were filtered and washed in  
284 RPMI 5% + DNase (15 µg/ml) FBS. All samples were cryopreserved in 90% FBS +  
285 10% DMSO and stored in liquid nitrogen.

286

### 287 **Single-cell Sequencing**

288 Experiment was performed as previously described (29). In brief, frozen samples  
289 were thawed and washed in RPMI 10% FBS + DNase (15 µg/ml). Samples were  
290 depleted of tumor cells ( $\alpha$ EpCAM – clone 9C4), Myeloid cells ( $\alpha$ CD14 – clone  
291 TUK4) and B cells ( $\alpha$ CD20 – clone 2H7) using anti-Mouse IgG microbeads (Miltenyi  
292 – 130-048-401). Cells were then incubated with BD AbSeq Ab-oligos following  
293 manufacturers' instructions. Single cells were isolated using Single Cell Capture and  
294 cDNA synthesis with the BD Rhapsody Express Single-cell Analysis System. Parallel  
295 RNA and BD AbSeq sequencing libraries were generated using BD Rhapsody  
296 targeted mRNA (BD – 633751) and AbSeq amplification and BD Single-cell  
297 Multiplexing kits and protocol (BD – 633771). Quality of final libraries was assessed  
298 using Agilent 2200 TapeStation with High Sensitivity D5000 ScreenTape, quantified  
299 using a Qubit Fluorometer (ThermoFisher), and carried through to sequencing with  
300 Novaseq S1 on Illumina sequencer. FASTQ files containing sequenced data were  
301 analyzed using the Seven Bridges platform provided by BD (See “BD Single Cell  
302 Genomics Bioinformatics Handbook – 54169 Rev. 6.0” for specific details) (29).

303

### 304 **Mass-cytometry staining**



305 Samples were stained as previously described (57, 58). In brief, antibody conjugation  
306 was performed according to the protocol provided by Fluidigm (See Table S1 for  
307 clone list and metals). Prior to surface staining, cells were stained with Cisplatin  
308 (viability marker) 5  $\mu$ M in PBS for 5 min. Cells were then stained in PBS + 0.5%  
309 BSA buffer with surface antibodies at 4°C for 15 min. After two washing steps, cells  
310 were fixed in fixation FoxP3 buffer (eBioscience – 00-5521-00) for 30 min at 4°C.  
311 After washing in perm buffer cells were stained with biotinylated FoxP3 during 30  
312 min at 4°C in perm buffer. Cells were washed and stained with streptavidin coupled  
313 to heavy metal for 30mn at 4°C in perm buffer. After two washing steps, cells were  
314 fixed in PBS 2% PFA overnight. Prior to CyTOF acquisition, cells were stained for  
315 DNA (Cell-ID intercalator-Ir, Fluidigm) for 10 min at room temperature, washed  
316 three times with dH2O and acquired on CyTOF.

317

### 318 **Data analysis and UMAP**

319 After mass cytometry (CyTOF) acquisition, any zero values were randomized using  
320 a uniform distribution of values between 0 and -1 using R. The signal of each  
321 parameter was normalized based on EQ beads (Fluidigm) as described previously  
322 (59). Samples were then used for UMAP analysis similar to that previously  
323 described using customized R scripts based on the ‘flowCore’ and ‘uwot’ R  
324 packages (31). In R, all data were transformed using the logicleTransform function  
325 (flowCore package) using parameters:  $w = 0.25$ ,  $t = 16409$ ,  $m = 4.5$ ,  $a = 0$  to roughly  
326 match scaling historically used in FlowJo. For heatmaps, median intensity  
327 corresponds to a logical data scale using formula previously described (60). The  
328 colors in the heat map represent the measured means intensity value of a given  
329 marker in a given sample. A seven-color scale is used with black–blue indicating  
330 low expression values, green–yellow indicating intermediately expressed markers,  
331 and orange-red representing highly expressed markers. Violin plots were generated  
332 using customized R scripts based on the ‘ggplot2’ R package (geom\_violin,  
333 geom\_boxplot, geom\_quasirandom).

334

### 335 **AIM (activation induced marker) assay**

336 AIM assay was performed as described previously (35). Briefly, on day 1, frozen  
337 paired blood and tumor samples were thawed and prepared as stated above. APC  
338 (gated as all CD3-CD45<sup>+</sup>live) were sorted from the PBMC, CD4<sup>+</sup> T cells (gated as

339 CD45<sup>+</sup>live CD3<sup>+</sup>CD4<sup>+</sup>) were sorted from blood and the tumors using BD FACSAria  
340 II. After sorting, cells were rested for 3h at 37°C, incubated with a CD40 blocking  
341 antibody for 15 min and put in coculture at a ratio of 1 CD4: 5 APC. Cells were then  
342 stimulated with either HCMV peptides pool (Catalogue number, 86.25ug/ml), DMSO  
343 (negative control, 100ug/ml) or SEB (positive control, 500ug/ml) for 18h. On day 2,  
344 cells were washed, stained with surface flow antibodies (Table S2) and acquired on  
345 BD FACSCelesta. Activation was measured with CD69 and CD40L expression on  
346 total CD4<sup>+</sup> T cells and bystander CD4<sup>+</sup> T cells were analyzed for CD39 expression.

## 347 **References**

348

- 349 1. Dunn GP, Bruce AT, Ikeda H, Old LJ, Schreiber RD. Cancer immunoediting:  
350 from immunosurveillance to tumor escape. *Nat Immunol.* 2002;3(11):991-8.
- 351 2. Schreiber RD, Old LJ, Smyth MJ. Cancer immunoediting: integrating  
352 immunity's roles in cancer suppression and promotion. *Science.*  
353 2011;331(6024):1565-70.
- 354 3. Pardoll DM. The blockade of immune checkpoints in cancer immunotherapy.  
355 *Nat Rev Cancer.* 2012;12(4):252-64.
- 356 4. Rosenberg SA, Restifo NP. Adoptive cell transfer as personalized  
357 immunotherapy for human cancer. *Science.* 2015;348(6230):62-8.
- 358 5. Ott PA, Hu Z, Keskin DB, Shukla SA, Sun J, Bozym DJ, et al. An  
359 immunogenic personal neoantigen vaccine for patients with melanoma. *Nature.*  
360 2017;547(7662):217-21.
- 361 6. Maleki Vareki S, Garrigos C, Duran I. Biomarkers of response to PD-1/PD-L1  
362 inhibition. *Crit Rev Oncol Hematol.* 2017;116:116-24.
- 363 7. Simoni Y, Becht E, Fehlings M, Loh CY, Koo SL, Teng KWW, et al.  
364 Bystander CD8(+) T cells are abundant and phenotypically distinct in human tumour  
365 infiltrates. *Nature.* 2018;557(7706):575-9.
- 366 8. Canale FP, Ramello MC, Nunez N, Araujo Furlan CL, Bossio SN, Gorosito  
367 Serran M, et al. CD39 Expression Defines Cell Exhaustion in Tumor-Infiltrating  
368 CD8(+) T Cells. *Cancer Res.* 2018;78(1):115-28.
- 369 9. Duhén T, Duhén R, Montler R, Moses J, Moudgil T, de Miranda NF, et al.  
370 Co-expression of CD39 and CD103 identifies tumor-reactive CD8 T cells in human  
371 solid tumors. *Nat Commun.* 2018;9(1):2724.
- 372 10. Scheper W, Kelderman S, Fanchi LF, Linnemann C, Bendle G, de Rooij MAJ,  
373 et al. Low and variable tumor reactivity of the intratumoral TCR repertoire in human  
374 cancers. *Nat Med.* 2019;25(1):89-94.
- 375 11. Rosato PC, Wijeyesinghe S, Stolley JM, Nelson CE, Davis RL, Manlove LS,  
376 et al. Virus-specific memory T cells populate tumors and can be repurposed for tumor  
377 immunotherapy. *Nat Commun.* 2019;10(1):567.
- 378 12. Wing JB, Tanaka A, Sakaguchi S. Human FOXP3(+) Regulatory T Cell  
379 Heterogeneity and Function in Autoimmunity and Cancer. *Immunity.*  
380 2019;50(2):302-16.
- 381 13. Saito T, Nishikawa H, Wada H, Nagano Y, Sugiyama D, Atarashi K, et al.  
382 Two FOXP3(+)CD4(+) T cell subpopulations distinctly control the prognosis of  
383 colorectal cancers. *Nat Med.* 2016;22(6):679-84.
- 384 14. Plitas G, Konopacki C, Wu K, Bos PD, Morrow M, Putintseva EV, et al.  
385 Regulatory T Cells Exhibit Distinct Features in Human Breast Cancer. *Immunity.*  
386 2016;45(5):1122-34.
- 387 15. Facciabene A, Motz GT, Coukos G. T-regulatory cells: key players in tumor  
388 immune escape and angiogenesis. *Cancer Res.* 2012;72(9):2162-71.
- 389 16. Zou W. Regulatory T cells, tumour immunity and immunotherapy. *Nat Rev*  
390 *Immunol.* 2006;6(4):295-307.
- 391 17. Tang F, Du X, Liu M, Zheng P, Liu Y. Anti-CTLA-4 antibodies in cancer  
392 immunotherapy: selective depletion of intratumoral regulatory T cells or checkpoint  
393 blockade? *Cell Biosci.* 2018;8:30.

- 394 18. Callahan MK, Wolchok JD, Allison JP. Anti-CTLA-4 antibody therapy:  
395 immune monitoring during clinical development of a novel immunotherapy. *Semin*  
396 *Oncol.* 2010;37(5):473-84.
- 397 19. Seidel JA, Otsuka A, Kabashima K. Anti-PD-1 and Anti-CTLA-4 Therapies in  
398 Cancer: Mechanisms of Action, Efficacy, and Limitations. *Front Oncol.* 2018;8:86.
- 399 20. Arce Vargas F, Furness AJS, Solomon I, Joshi K, Mekkaoui L, Lesko MH, et  
400 al. Fc-Optimized Anti-CD25 Depletes Tumor-Infiltrating Regulatory T Cells and  
401 Synergizes with PD-1 Blockade to Eradicate Established Tumors. *Immunity.*  
402 2017;46(4):577-86.
- 403 21. Arce Vargas F, Furness AJS, Litchfield K, Joshi K, Rosenthal R, Ghorani E, et  
404 al. Fc Effector Function Contributes to the Activity of Human Anti-CTLA-4  
405 Antibodies. *Cancer Cell.* 2018;33(4):649-63 e4.
- 406 22. Alspach E, Lussier DM, Miceli AP, Kizhvatov I, DuPage M, Luoma AM, et  
407 al. MHC-II neoantigens shape tumour immunity and response to immunotherapy.  
408 *Nature.* 2019;574(7780):696-701.
- 409 23. Melsens M, Slingluff CL, Jr. Vaccines targeting helper T cells for cancer  
410 immunotherapy. *Curr Opin Immunol.* 2017;47:85-92.
- 411 24. Quezada SA, Simpson TR, Peggs KS, Merghoub T, Vider J, Fan X, et al.  
412 Tumor-reactive CD4(+) T cells develop cytotoxic activity and eradicate large  
413 established melanoma after transfer into lymphopenic hosts. *J Exp Med.*  
414 2010;207(3):637-50.
- 415 25. Wong SB, Bos R, Sherman LA. Tumor-specific CD4+ T cells render the  
416 tumor environment permissive for infiltration by low-avidity CD8+ T cells. *J*  
417 *Immunol.* 2008;180(5):3122-31.
- 418 26. Church SE, Jensen SM, Antony PA, Restifo NP, Fox BA. Tumor-specific  
419 CD4+ T cells maintain effector and memory tumor-specific CD8+ T cells. *Eur J*  
420 *Immunol.* 2014;44(1):69-79.
- 421 27. Matsuzaki J, Tsuji T, Luescher IF, Shiku H, Mineno J, Okamoto S, et al.  
422 Direct tumor recognition by a human CD4(+) T-cell subset potently mediates tumor  
423 growth inhibition and orchestrates anti-tumor immune responses. *Sci Rep.*  
424 2015;5:14896.
- 425 28. Malandro N, Budhu S, Kuhn NF, Liu C, Murphy JT, Cortez C, et al. Clonal  
426 Abundance of Tumor-Specific CD4(+) T Cells Potentiates Efficacy and Alters  
427 Susceptibility to Exhaustion. *Immunity.* 2016;44(1):179-93.
- 428 29. Mair F, Erickson JR, Voillet V, Simoni Y, Bi T, Tyznik AJ, et al. A Targeted  
429 Multi-omic Analysis Approach Measures Protein Expression and Low-Abundance  
430 Transcripts on the Single-Cell Level. *Cell Rep.* 2020;31(1):107499.
- 431 30. Shahi P, Kim SC, Haliburton JR, Gartner ZJ, Abate AR. Abseq: Ultrahigh-  
432 throughput single cell protein profiling with droplet microfluidic barcoding. *Sci Rep.*  
433 2017;7:44447.
- 434 31. Becht E, McInnes L, Healy J, Dutertre CA, Kwok IWH, Ng LG, et al.  
435 Dimensionality reduction for visualizing single-cell data using UMAP. *Nat*  
436 *Biotechnol.* 2018.
- 437 32. Raczkowski F, Rissiek A, Ricklefs I, Heiss K, Schumacher V, Wundenberg K,  
438 et al. CD39 is upregulated during activation of mouse and human T cells and  
439 attenuates the immune response to *Listeria monocytogenes*. *PLoS One.*  
440 2018;13(5):e0197151.
- 441 33. Yan D, Farache J, Mingueneau M, Mathis D, Benoist C. Imbalanced signal  
442 transduction in regulatory T cells expressing the transcription factor FoxP3. *Proc Natl*  
443 *Acad Sci U S A.* 2015;112(48):14942-7.

- 444 34. Han S, Yang Y. Interleukin-32: Frenemy in cancer? *BMB Rep.*  
445 2019;52(3):165-74.
- 446 35. Reiss S, Baxter AE, Cirelli KM, Dan JM, Morou A, Daigneault A, et al.  
447 Comparative analysis of activation induced marker (AIM) assays for sensitive  
448 identification of antigen-specific CD4 T cells. *PLoS One.* 2017;12(10):e0186998.
- 449 36. Shankaran V, Ikeda H, Bruce AT, White JM, Swanson PE, Old LJ, et al.  
450 IFN $\gamma$  and lymphocytes prevent primary tumour development and shape tumour  
451 immunogenicity. *Nature.* 2001;410(6832):1107-11.
- 452 37. Reading JL, Galvez-Cancino F, Swanton C, Lladser A, Peggs KS, Quezada  
453 SA. The function and dysfunction of memory CD8(+) T cells in tumor immunity.  
454 *Immunol Rev.* 2018;283(1):194-212.
- 455 38. Farhood B, Najafi M, Mortezaee K. CD8(+) cytotoxic T lymphocytes in  
456 cancer immunotherapy: A review. *J Cell Physiol.* 2019;234(6):8509-21.
- 457 39. van der Leun AM, Thommen DS, Schumacher TN. CD8(+) T cell states in  
458 human cancer: insights from single-cell analysis. *Nat Rev Cancer.* 2020;20(4):218-32.
- 459 40. Tanaka A, Sakaguchi S. Targeting Treg cells in cancer immunotherapy. *Eur J*  
460 *Immunol.* 2019;49(8):1140-6.
- 461 41. Ahrends T, Spanjaard A, Pilzecker B, Babala N, Bovens A, Xiao Y, et al.  
462 CD4(+) T Cell Help Confers a Cytotoxic T Cell Effector Program Including  
463 Coinhibitory Receptor Downregulation and Increased Tissue Invasiveness. *Immunity.*  
464 2017;47(5):848-61 e5.
- 465 42. Perez-Diez A, Joncker NT, Choi K, Chan WF, Anderson CC, Lantz O, et al.  
466 CD4 cells can be more efficient at tumor rejection than CD8 cells. *Blood.*  
467 2007;109(12):5346-54.
- 468 43. Mumberg D, Monach PA, Wanderling S, Philip M, Toledano AY, Schreiber  
469 RD, et al. CD4(+) T cells eliminate MHC class II-negative cancer cells in vivo by  
470 indirect effects of IFN- $\gamma$ . *Proc Natl Acad Sci U S A.* 1999;96(15):8633-8.
- 471 44. Haabeth OA, Tveita AA, Fauskanger M, Schjesvold F, Lørvik KB, Hofgaard  
472 PO, et al. How Do CD4(+) T Cells Detect and Eliminate Tumor Cells That Either  
473 Lack or Express MHC Class II Molecules? *Front Immunol.* 2014;5:174.
- 474 45. Li J, Byrne KT, Yan F, Yamazoe T, Chen Z, Baslan T, et al. Tumor Cell-  
475 Intrinsic Factors Underlie Heterogeneity of Immune Cell Infiltration and Response to  
476 Immunotherapy. *Immunity.* 2018;49(1):178-93 e7.
- 477 46. Bastid J, Cottalorda-Regairaz A, Alberici G, Bonnefoy N, Eliaou JF,  
478 Bensussan A. ENTPD1/CD39 is a promising therapeutic target in oncology.  
479 *Oncogene.* 2013;32(14):1743-51.
- 480 47. Elliott MR, Cheleni FB, Trampont PC, Lazarowski ER, Kadl A, Walk SF, et  
481 al. Nucleotides released by apoptotic cells act as a find-me signal to promote  
482 phagocytic clearance. *Nature.* 2009;461(7261):282-6.
- 483 48. Ohta A, Gorelik E, Prasad SJ, Ronchese F, Lukashev D, Wong MK, et al.  
484 A2A adenosine receptor protects tumors from antitumor T cells. *Proc Natl Acad Sci*  
485 *U S A.* 2006;103(35):13132-7.
- 486 49. Gupta PK, Godec J, Wolski D, Adland E, Yates K, Pauken KE, et al. CD39  
487 Expression Identifies Terminally Exhausted CD8+ T Cells. *PLoS Pathog.*  
488 2015;11(10):e1005177.
- 489 50. Deaglio S, Dwyer KM, Gao W, Friedman D, Usheva A, Erat A, et al.  
490 Adenosine generation catalyzed by CD39 and CD73 expressed on regulatory T cells  
491 mediates immune suppression. *J Exp Med.* 2007;204(6):1257-65.
- 492 51. Borsellino G, Kleinewietfeld M, Di Mitri D, Sternjak A, Diamantini A,  
493 Giometto R, et al. Expression of ectonucleotidase CD39 by Foxp3+ Treg cells:

- 494 hydrolysis of extracellular ATP and immune suppression. *Blood*. 2007;110(4):1225-  
495 32.
- 496 52. Dwyer KM, Hanidziar D, Putheti P, Hill PA, Pommey S, McRae JL, et al.  
497 Expression of CD39 by human peripheral blood CD4+ CD25+ T cells denotes a  
498 regulatory memory phenotype. *Am J Transplant*. 2010;10(11):2410-20.
- 499 53. Nepom GT. MHC class II tetramers. *J Immunol*. 2012;188(6):2477-82.
- 500 54. Chen DS, Mellman I. Elements of cancer immunity and the cancer-immune  
501 set point. *Nature*. 2017;541(7637):321-30.
- 502 55. Whiteside SK, Snook JP, Williams MA, Weis JJ. Bystander T Cells: A  
503 Balancing Act of Friends and Foes. *Trends Immunol*. 2018;39(12):1021-35.
- 504 56. Christoffersson G, Chodaczek G, Ratliff SS, Coppieters K, von Herrath MG.  
505 Suppression of diabetes by accumulation of non-islet-specific CD8(+) effector T cells  
506 in pancreatic islets. *Sci Immunol*. 2018;3(21).
- 507 57. Simoni Y, Fehlings M, Kloverpris HN, McGovern N, Koo SL, Loh CY, et al.  
508 Human Innate Lymphoid Cell Subsets Possess Tissue-Type Based Heterogeneity in  
509 Phenotype and Frequency. *Immunity*. 2017;46(1):148-61.
- 510 58. Simoni Y, Fehlings M, Newell EW. Multiplex MHC Class I Tetramer  
511 Combined with Intranuclear Staining by Mass Cytometry. *Methods Mol Biol*.  
512 2019;1989:147-58.
- 513 59. Finck R, Simonds EF, Jager A, Krishnaswamy S, Sachs K, Fantl W, et al.  
514 Normalization of mass cytometry data with bead standards. *Cytometry A*.  
515 2013;83(5):483-94.
- 516 60. Moore WA, Parks DR. Update for the logicle data scale including operational  
517 code implementations. *Cytometry A*. 2012;81(4):273-7.
- 518
